# Supplementary material for: Facile and adaptable synthesis method of mesostructured silica thin films
Source: Royal Society of Chemistry journal article supplement (doi:10.1039/b718871d), 2008-01-01
Supplement: b718871d.pdf [file b718871d.pdf]

Supplementary Material (ESI) for Journal of Materials Chemistry

This journal is (c) The Royal Society of Chemistry 2008

**Supplementary Information**

# Facile and Adaptable Synthesis Method of Mesostructured Silica Thin Films

*U-Hwang Lee, Jae-Hun Yang, Hyun-ju Lee, Jin-Young Park, Ki-Rim Lee and Young-Uk*

*Kwon\**

Center for Nanotubes and Nanostructured Composites, Department of Chemistry, BK-

21 School of Chemical Materials, SKKU Advanced Institute of Nanotechnology,

Sungkyunkwan University, Suwon 440-746, Korea

**Figure S1.**  $^{29}\text{Si}$ -NMR spectra of coating solutions for SKU-1~4 and SKU-5~8.

**Figure S2.** Low angle X-ray diffraction patterns of calcined films synthesized with the coating solution for SKU-1 under various conditions. Changes of the mesostructures are induced by (a) the humidity levels during spin coating step and (b) the aging time.

**Figure S3.** Changes of low angle X-ray diffraction patterns with the aging time of (a) as-casted and (b) calcined mesoporous curved lamellar films. (SKU-4)

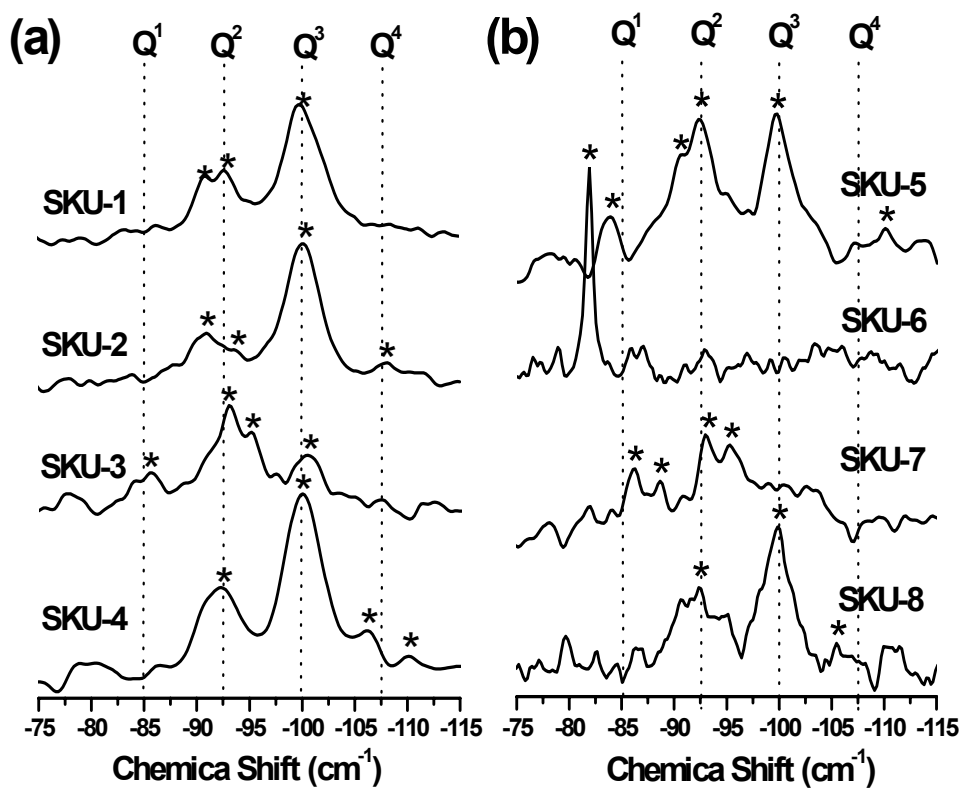

**Figure S1.**  $^{29}\text{Si}$ -NMR spectra of coating solutions for SKU-1~4 and SKU-5~8.

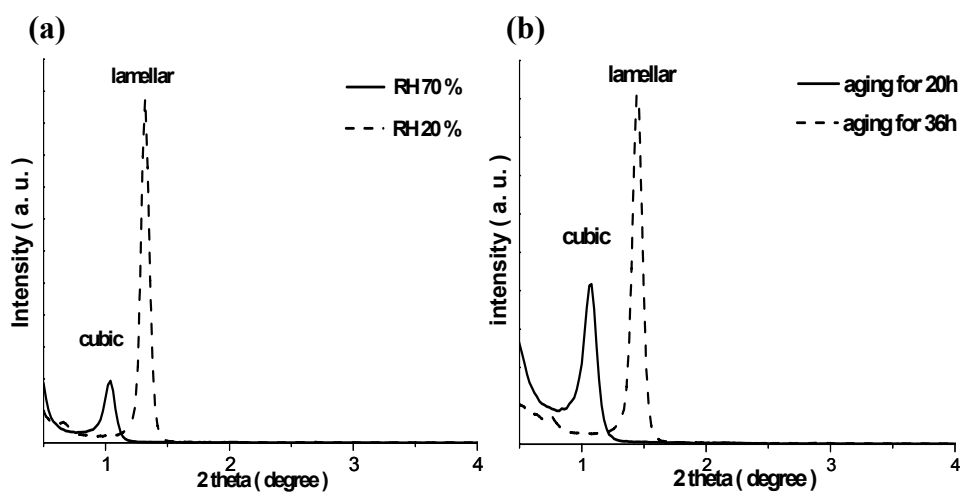

**Figure S2.** Low angle X-ray diffraction patterns of calcined films synthesized with the coating solution for SKU-1 under various conditions. Changes of the mesostructures are induced by (a) the humidity levels during spin coating step and (b) the aging time.

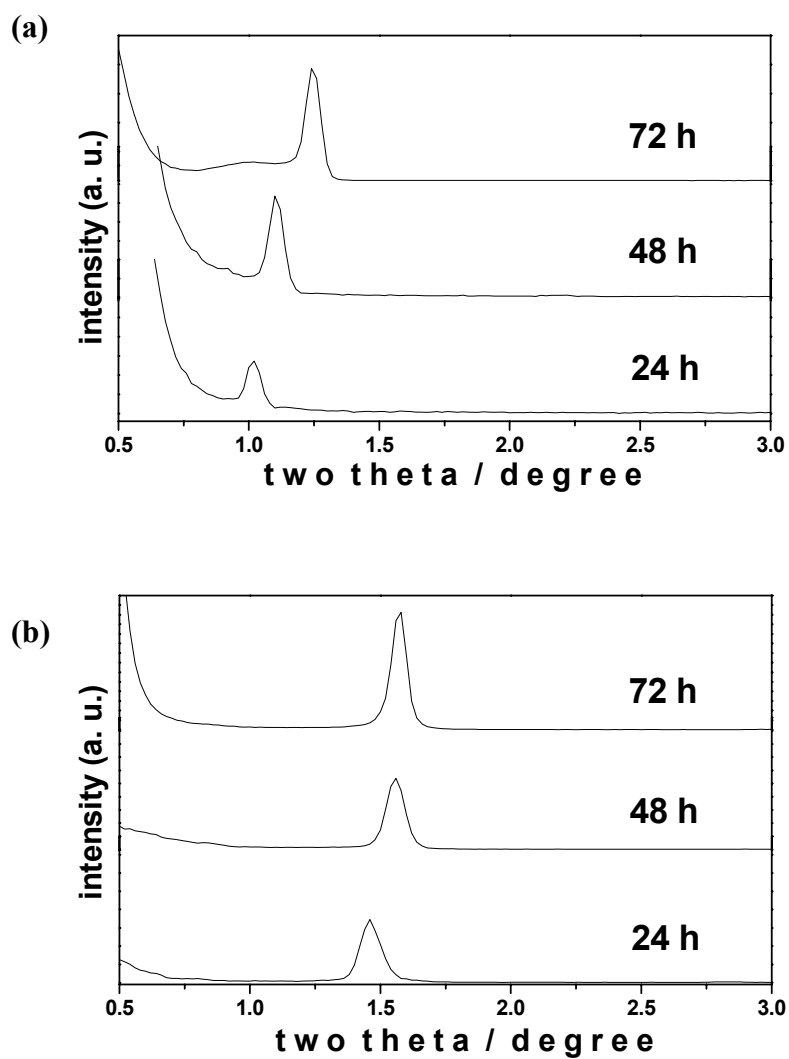

**Figure S3.** Changes of low angle X-ray diffraction patterns with the aging time of (a) as-casted and (b) calcined mesoporous curved lamellar films. (SKU-4)

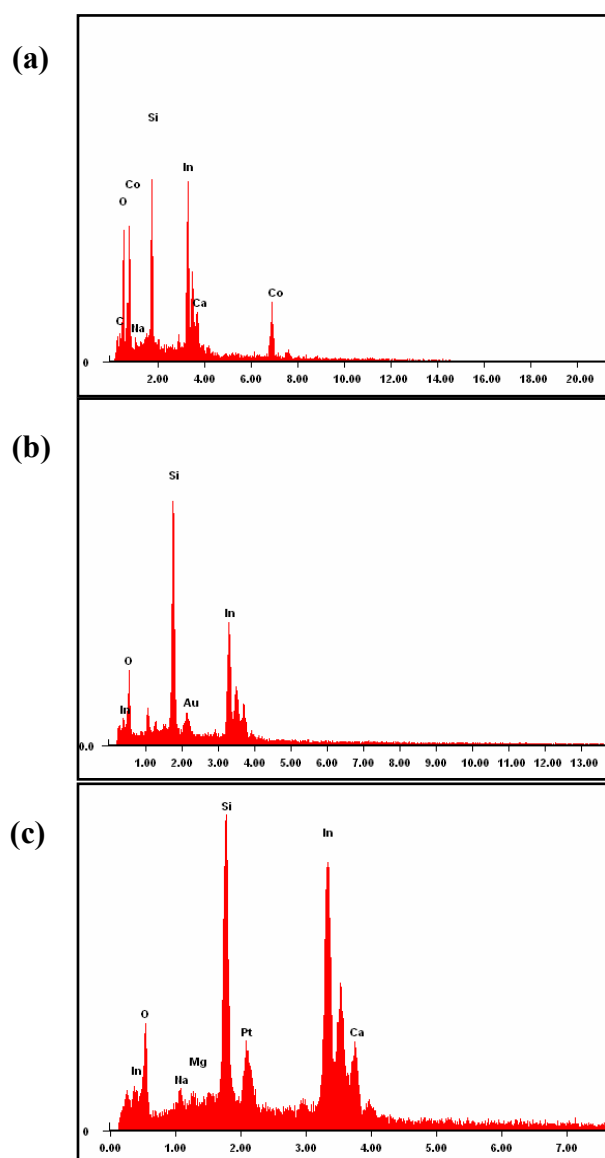

**Figure S4.** EDX spectra of (a) Co replica of SKU-1, (b) Au replica of SKU-2, and (c) Pt replica of SKU-4.
